# Supplementary material for: Overexpression screen of chromosome 21 genes reveals modulators of Sonic hedgehog signaling relevant to Down syndrome
Source: Oxford University Press journal article supplement (doi:10.1242/dmm.049712), 2023-03-30
Supplement: dmm049712supp.pdf [file dmm049712supp.pdf]

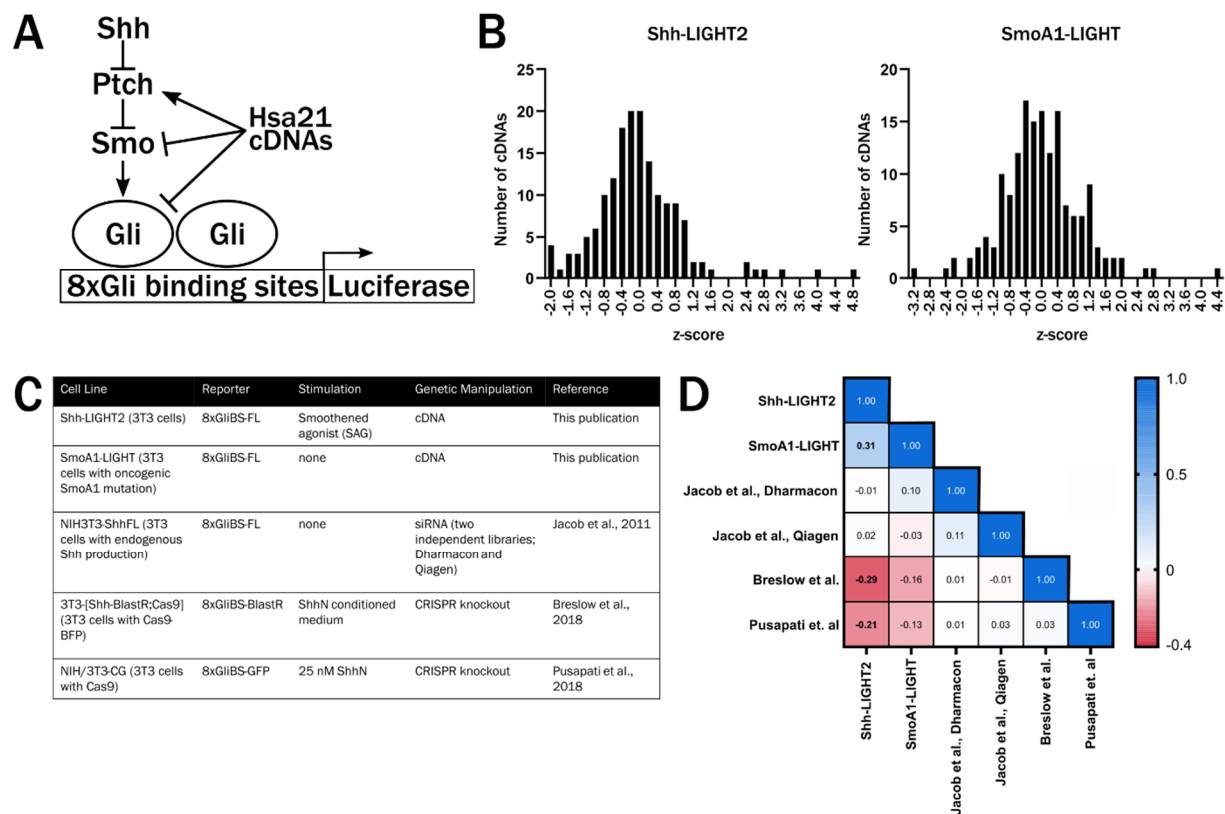

**Fig. S1. Shh-LIGHT2 and SmoA1-LIGHT screens.** (A) Schematic of SHH signaling and 8xGliBS-FL reporter. Sonic hedgehog binds to Patched and relieves inhibition of Smoothed, which acts as a transducer to activate signaling via the Gli transcription factors. Binding of Gli to the 8xGliBS-FL promotes transcription of luciferase. Overexpression of chromosome 21 genes may activate or inhibit SHH signaling at any level of the signaling pathway. (B) Distribution of z-scores in Shh-LIGHT2 and SmoA1-LIGHT cDNA overexpression screens. (C) Summary of previously reported siRNA knockdown and CRISPR knockout screens using the 8xGliBS reporter. Data for individual genes are available in table S6. (D) Correlation matrix showing Pearson correlation coefficient  $r$  between pairs of screens for the 115 chromosome 21 genes and mouse orthologs with data across all screens. Bolded correlation coefficients have  $P < 0.05$ . The Shh-LIGHT2 and SmoA1-LIGHT cDNA screens are positively correlated, whereas Shh-LIGHT2 shows a negative correlation with two CRISPR knockout screens.

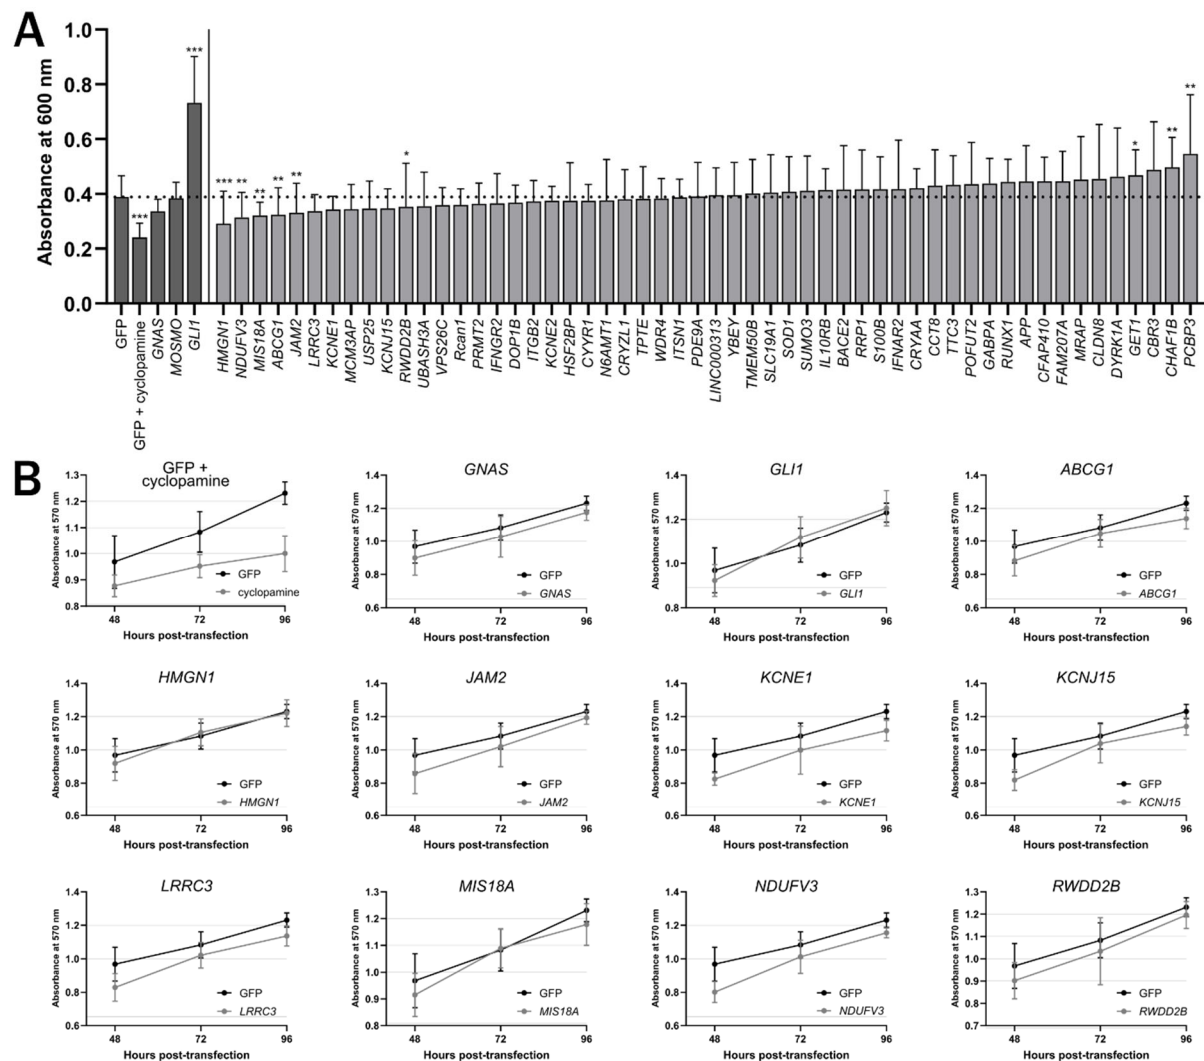

**Fig. S2. C3H10T1/2 osteoblast differentiation and viability following transfection of chromosome 21 cDNAs.** (A) Quantification of alkaline phosphatase activity following transfection of chromosome 21 cDNAs and stimulation with SAG (n=20). All conditions were compared to GFP control. \*\*\*P<0.001, \*\*P<0.01, \*P<0.05 (Kruskal-Wallis test followed by Dunn's post-hoc test). (B) Quantification of viability of untreated C3H10T1/2 cells 48, 72, and 96 hours post-transfection (n=7). In cells treated with SAG, only cycloamine treatment affected viability (data not shown).

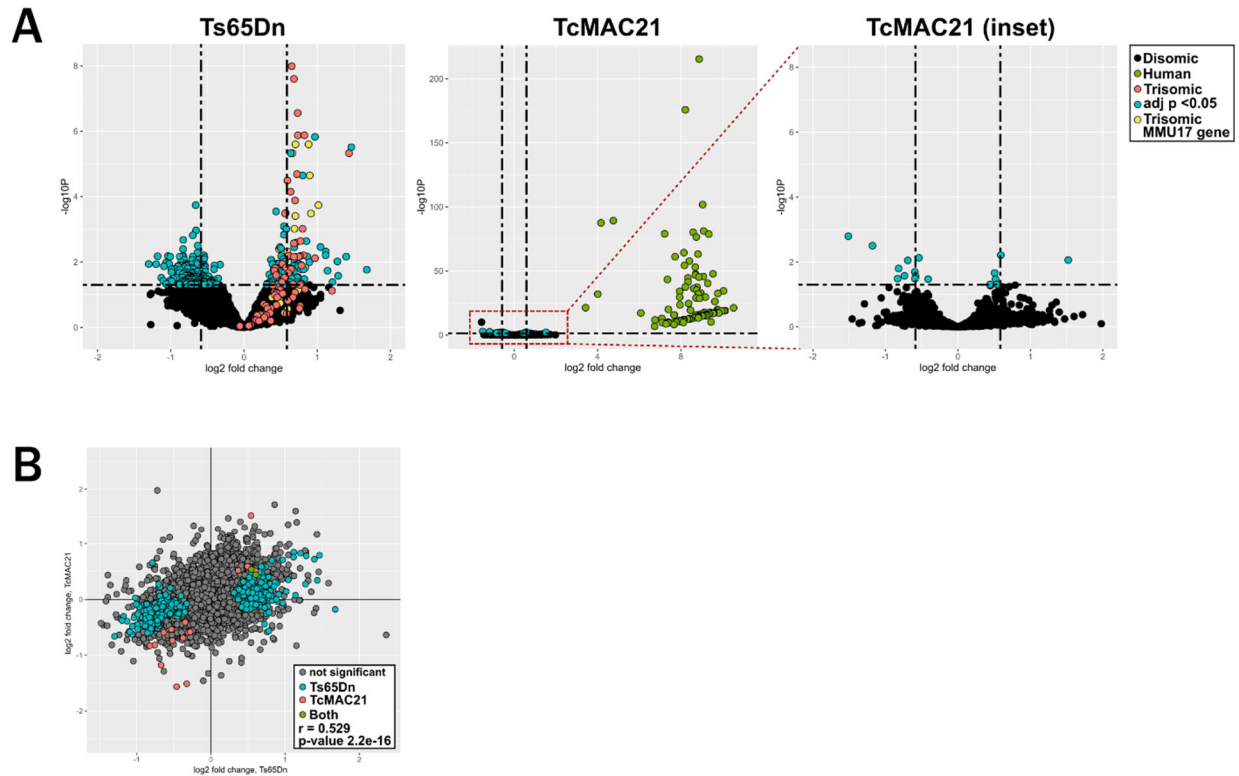

**Fig. S3. Expression of disomic genes in Ts65Dn and TcMAC21 cerebellum.** (A) Volcano plots showing log<sub>2</sub> fold change and -log<sub>10</sub>(P value) in Ts65Dn and TcMAC21 samples. Teal points represent disomic transcripts with adjusted  $P < 0.05$ , salmon points represent chromosome 21 orthologs that are trisomic in Ts65Dn, yellow points represent non-chromosome 21 orthologs (MMU17) transcripts that are trisomic in Ts65Dn, and green points represent human transcripts in TcMAC21 samples. (B) Scatterplot showing log<sub>2</sub> fold change of disomic transcripts in Ts65Dn and TcMAC21 samples. Teal points are significantly differentially expressed in Ts65Dn samples, salmon points are significantly differentially expressed in TcMAC21 samples, and green points are differentially expressed in both Ts65Dn and TcMAC21 samples. Pearson correlation coefficient  $r=0.529$  and  $P=2.2e-16$ .

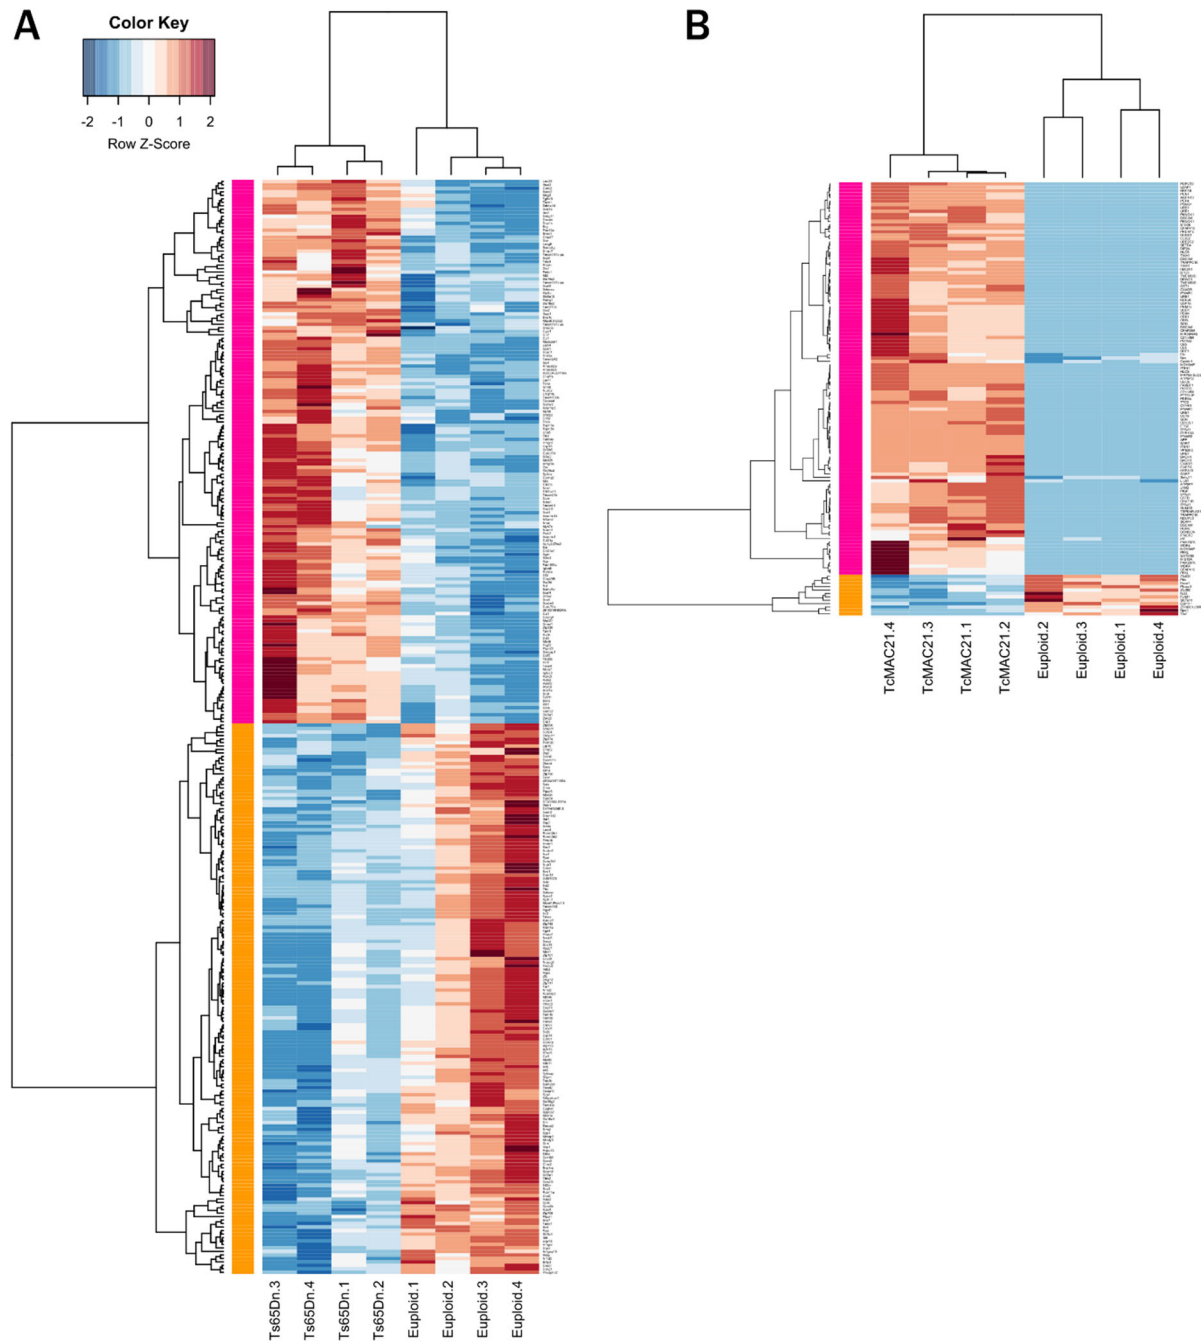

**Fig. S4. Unsupervised clustering of differentially expressed genes in Ts65Dn and TcMAC21 samples.** (A) Unsupervised clustering of 314 differentially expressed transcripts (rows) in 4 Ts65Dn cerebella and 4 euploid littermates (columns). The orange module represents genes downregulated in Ts65Dn relative to control and the pink module represents genes upregulated in Ts65Dn. (B) Unsupervised clustering of 127 differentially expressed transcripts in 4 TcMAC21 cerebella and 4 euploid littermates. 109/127 differentially expressed transcripts derive from the HSA21q-MAC hybrid chromosome.

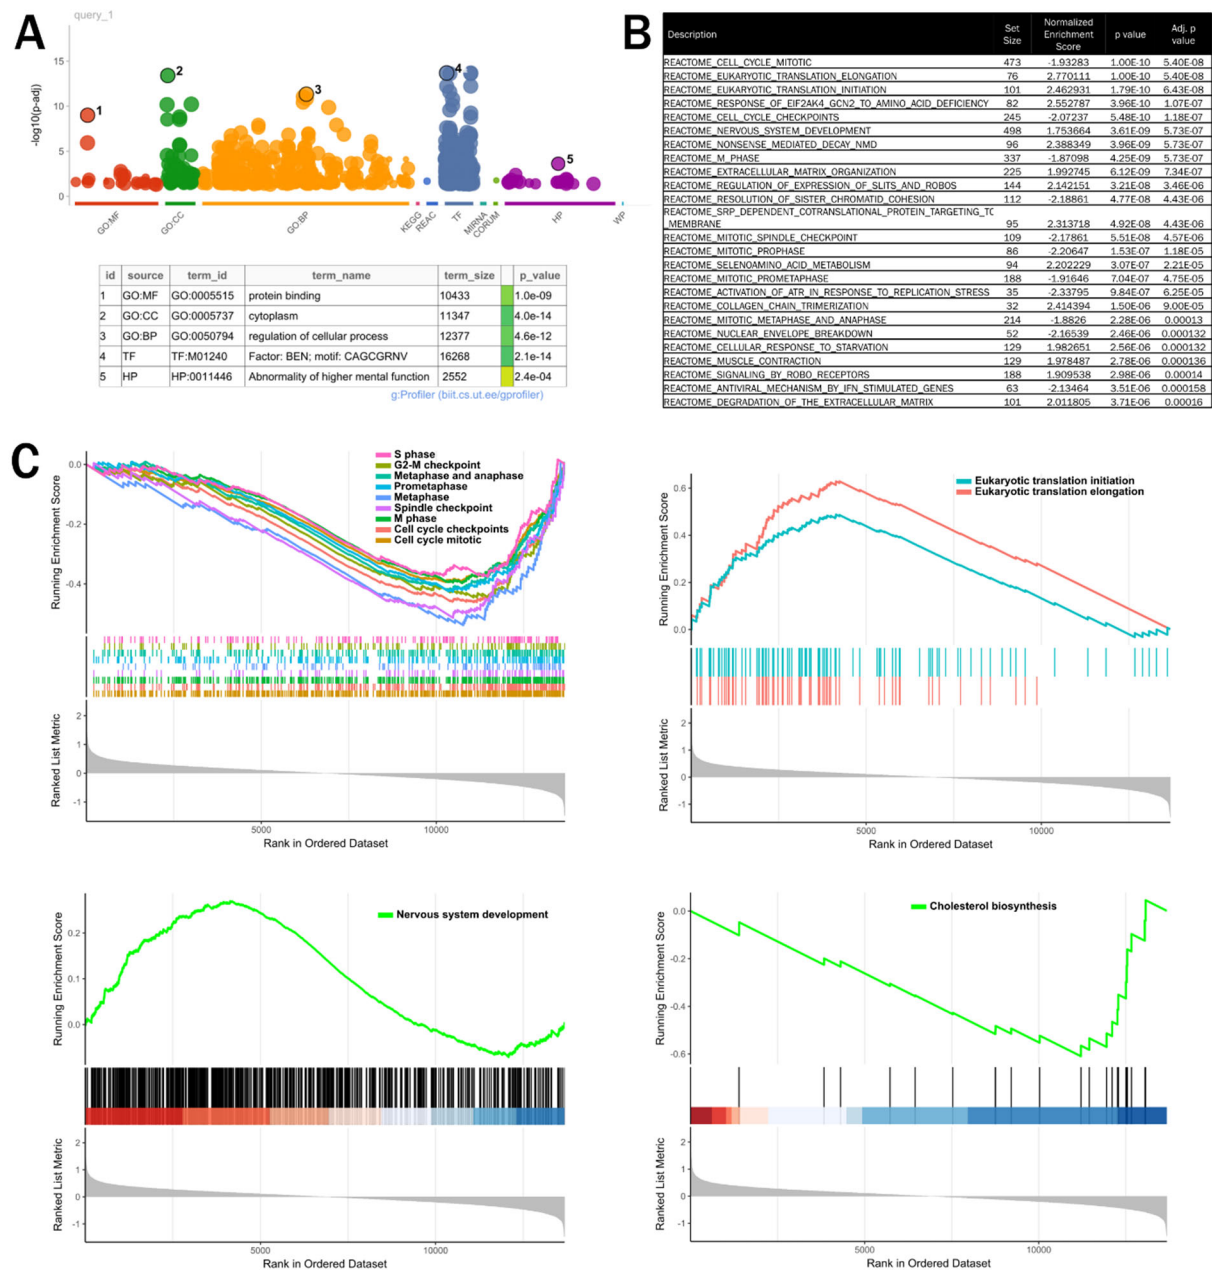

**Fig. S5. Gene ontology and gene set enrichment analyses of differentially expressed genes in Ts65Dn cerebellum.** (A) Manhattan plot showing top gene ontology terms identified in Ts65Dn cerebellum. Differentially expressed genes contributing to “abnormality of higher mental function” are listed in figure S6. (B) Top 25 pathways identified by gene set enrichment analysis in Ts65Dn samples. (C) Gene set enrichment analysis for pathways significantly enriched in Ts65Dn samples (translation and nervous system development) and pathways enriched in control samples (mitotic/cell cycle and cholesterol biosynthesis).

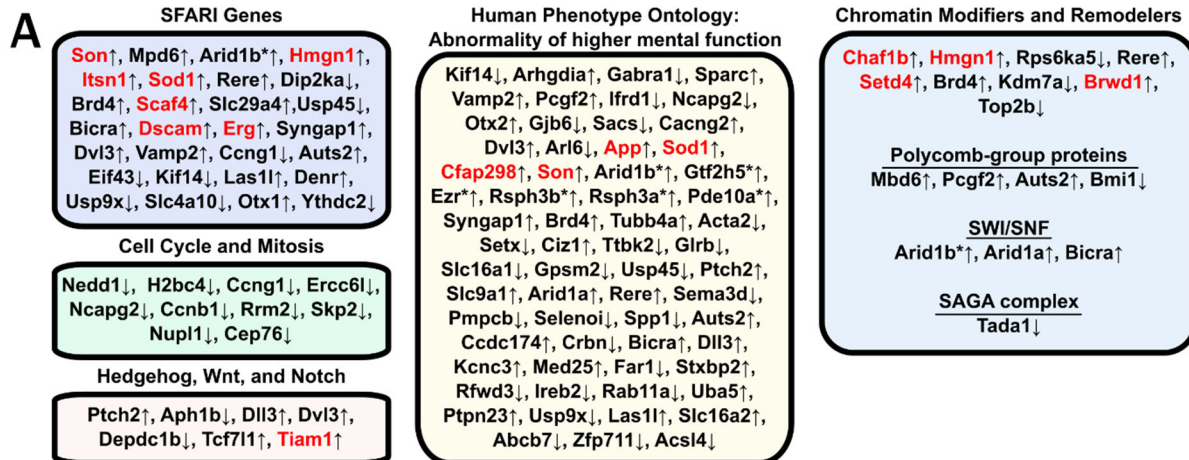

**Fig. S6. Differentially expressed genes in Ts65Dn cerebellum are implicated in human neurodevelopmental disorders, mitosis, and chromatin remodeling.** (A) Subset of differentially expressed genes ( $q < 0.05$ ) identified in Ts65Dn grouped by cellular and disease processes. Up arrows signify genes that are upregulated in Ts65Dn samples, asterisks signify genes that are trisomic in Ts65Dn mice but are not orthologs of chromosome 21 genes, and red signifies trisomic genes that are orthologs of chromosome 21 genes. Differentially expressed genes include 28 in the SFARI Gene database of autism susceptibility loci and others related to cell cycle/mitosis, key developmental pathways including SHH, and chromatin modifiers and remodelers.



**Table S1.** Cerebellar Volumes of Down Syndrome Models

[Click here to download Table S1](#)

**Table S2.** Manual Annotation of HSA21 Genes

[Click here to download Table S2](#)

**Table S3.** Plasmid Information

[Click here to download Table S3](#)

**Table S4.** Shh-LIGHT2 Screen

[Click here to download Table S4](#)

**Table S5.** SmoA1-LIGHT Screen

[Click here to download Table S5](#)

**Table S6.** Screen Comparisons

[Click here to download Table S6](#)

**Table S7.** Ts65Dn RNA-seq in P6 Cerebellum

[Click here to download Table S7](#)

**Table S8.** TcMAC21 RNA-seq in P6 Cerebellum

[Click here to download Table S8](#)

**Table S9.** Gene Set Enrichment Analysis in Ts65Dn Cerebellum

[Click here to download Table S9](#)

**Table S10.** Summary of Expression Data in Human and Mouse Cerebellum

[Click here to download Table S10](#)
